# Supplementary material
Source: PubMed Central journal article supplement (PMC521638)
Supplement: nar_32_17_5147__1.pdf [file nar_32_17_5147__1.pdf]

**Table 1.** Dataset of 42 protein-RNA complexes selected from PDB. Among them, 25 structures are used for training and 17 used for testing.

| Training Set |          |                                                  | Testing Set |          |                                                      |
|--------------|----------|--------------------------------------------------|-------------|----------|------------------------------------------------------|
| PDB          | Res. (Å) | Ref.                                             | PDB         | Res. (Å) | Ref.                                                 |
| 1A1V         | 2.20     | <i>Structure</i> 1998, <b>6</b> , p89.           | 1A34        | 1.81     | <i>J. Mol. Biol.</i> , 1998, <b>277</b> , p37.       |
| 1A9N         | 2.38     | <i>Nature</i> 1998, <b>394</b> , p645.           | 1C9S        | 1.90     | <i>Nature</i> 1999, <b>401</b> , p235.               |
| 1B2M         | 2.00     | <i>Biochemistry</i> 1999, <b>38</b> , p2452.     | 1CX0        | 2.30     | <i>Nature</i> , 1998, <b>395</b> , p567.             |
| 1C0A         | 2.40     | <i>EMBO J.</i> 1999, <b>18</b> , p6532.          | 1DFU        | 1.80     | <i>PNAS</i> , 2000, <b>97</b> , p2023.               |
| 1DI2         | 1.90     | <i>EMBO J.</i> 1998, <b>17</b> , p7505.          | 1DUL        | 1.80     | <i>Science</i> 2000, <b>287</b> , p1232.             |
| 1E6T         | 2.20     | <i>RNA</i> 2001, <b>7</b> , p1616.               | 1FEU        | 2.30     | <i>Acta.Crys.</i> , Sect. D, 2001, <b>57</b> , p968. |
| 1EC6         | 2.40     | <i>Cell</i> 2000, <b>100</b> , p323.             | 1HP6        | 2.40     | <i>Nature</i> 2001, <b>410</b> , p780.               |
| 1F7U         | 2.20     | <i>EMBO J.</i> 2000, <b>19</b> , p5599.          | 1M5O        | 2.20     | <i>Science</i> 2002, <b>298</b> , p1421.             |
| 1FXL         | 1.80     | <i>Nat. Stru. Biol.</i> 2001, <b>8</b> , p141.   | 1MJI        | 2.50     | <i>RNA</i> 2002, <b>8</b> , p1548.                   |
| 1G59         | 2.40     | <i>Nat. Stru. Biol.</i> 2001, <b>8</b> , p203.   | 1MSW        | 2.10     | <i>Science</i> 2002, <b>298</b> , p1387.             |
| 1GTF         | 1.75     | <i>Acta. Crys. Sect.</i> 2002, D 58, p615.       | 1N35        | 2.50     | <i>Cell</i> 2002, <b>111</b> , p733.                 |
| 1H2T         | 2.15     | <i>EMBO. J.</i> 2002, <b>21</b> , p5548.         | 1N78        | 2.10     | <i>EMBO J.</i> 2003, <b>22</b> , p676.               |
| 1HQ1         | 1.52     | <i>J. Mol. Biol.</i> 2001, <b>307</b> , p229.    | 1QTQ        | 2.40     | <i>Structure</i> 1998, <b>6</b> , p439.              |
| 1J1U         | 1.95     | <i>Nat. Struct. Biol.</i> 2003, <b>10</b> , p425 | 1R3E        | 2.10     | <i>PNAS</i> 2003, <b>100</b> , p12648.               |
| 1JBS         | 1.97     | <i>Nat. Stru. Biol.</i> 2001, <b>8</b> , p968.   | 1R9F        | 1.85     | <i>Nature</i> 2003, <b>426</b> , p874.               |
| 1JID         | 1.80     | <i>Science</i> 2001, <b>294</b> , p598.          | 1RPU        | 2.50     | <i>Cell</i> , 2003, <b>115</b> , p799.               |

|      |      |                                         |      |      |                                          |
|------|------|-----------------------------------------|------|------|------------------------------------------|
| 1JJ2 | 2.40 | <i>EMBO J.</i> 2001, <b>20</b> , p4214. | 1UVJ | 1.90 | <i>Structure</i> 2004, <b>12</b> , p307. |
| 1K8W | 1.85 | <i>Cell</i> 2001, <b>107</b> , p929.    |      |      |                                          |
| 1KNZ | 2.45 | <i>Cell</i> 2002, <b>108</b> , p71.     |      |      |                                          |
| 1LNG | 2.30 | <i>Nature</i> 2002, <b>417</b> , p767.  |      |      |                                          |
| 1M8W | 2.20 | <i>Cell</i> 2002, <b>110</b> , p501.    |      |      |                                          |
| 1OOA | 2.45 | <i>PNAS</i> 2003, <b>100</b> , p9268.   |      |      |                                          |
| 1QTQ | 2.40 | <i>Structure</i> 1998, <b>6</b> , p439. |      |      |                                          |
| 1URN | 1.92 | <i>Nature</i> 1994, <b>372</b> , p432.  |      |      |                                          |
| 2A8V | 2.40 | <i>Mol. Cell</i> 1999, <b>3</b> , p487. |      |      |                                          |

Table 2. Distance-dependent energy parameters for the hydrogen bonds between protein and DNA/RNA. Energies are omitted for bins with zero counts (cutoff values).

| <i>DISTANCE<br/>BIN [Å]<br/>(1.0 Å per bin)</i> |     | <i>ENERGY</i> |          |          |          |          |          |          |          |          |           |           |
|-------------------------------------------------|-----|---------------|----------|----------|----------|----------|----------|----------|----------|----------|-----------|-----------|
|                                                 |     | <i>1</i>      | <i>2</i> | <i>3</i> | <i>4</i> | <i>5</i> | <i>6</i> | <i>7</i> | <i>8</i> | <i>9</i> | <i>10</i> | <i>11</i> |
| 1.4                                             | 1.5 | -             | -        | -        | 1.51     | -        | -        | -        | -        | -        | -         | -         |
| 1.5                                             | 1.6 | -             | -        | -        | 1.17     | -        | 1.20     | -        | -        | -        | -         | 1.53      |
| 1.6                                             | 1.7 | -0.10         | -        | 0.38     | 0.48     | 1.25     | 0.29     | 1.61     | -        | 0.29     | -         | 0.69      |
| 1.7                                             | 1.8 | -0.39         | -        | -0.32    | -0.06    | -        | -0.41    | 0.92     | -0.69    | -0.41    | -         | -0.59     |
| 1.8                                             | 1.9 | -0.88         | -0.54    | -0.88    | -0.62    | 1.25     | -0.30    | -0.59    | -        | -1.10    | -         | -0.98     |
| 1.9                                             | 2.0 | -0.61         | -1.23    | -0.88    | -0.69    | -0.13    | -0.94    | -0.96    | -1.39    | -1.10    | -0.09     | -1.03     |
| 2                                               | 2.1 | -0.51         | -0.54    | -0.32    | -0.41    | -0.54    | -0.50    | -0.96    | -1.39    | -0.41    | -1.19     | -0.50     |
| 2.1                                             | 2.2 | -0.51         | -0.54    | -0.54    | -0.28    | -0.69    | -0.18    | -0.34    | -0.69    | 0.29     | -1.19     | -0.01     |
| 2.2                                             | 2.3 | 0.30          | -        | -0.03    | 0.13     | -0.36    | 0.11     | -0.34    | -        | 0.29     | -0.09     | 0.44      |
| 2.3                                             | 2.4 | 1.00          | -        | 0.38     | 0.08     | -0.54    | 0.29     | 0.51     | -        | 0.29     | -0.09     | 1.25      |
| 2.4                                             | 2.5 | 1.69          | -0.54    | 1.07     | 0.48     | -0.36    | 0.51     | 0.51     | -        | -        | -0.09     | 1.53      |
| 2.5                                             | 2.6 | 0.59          | -0.54    | -        | 0.35     | -0.69    | 0.80     | 0.92     | -        | -        | -0.09     | 1.53      |

*1*, na\_NH\_aa\_sc\_sp2; *2*, na\_NH\_aa\_sc\_sp3; *3*, na\_NH\_aa\_bb\_O; *4*, na\_P\_aa\_sc\_NH; *5*, na\_O\_aa\_sc\_NH; *6*, na\_base\_O\_aa\_sc\_NH; *7*, na\_base\_N\_aa\_sc\_NH; *8*, na\_base\_N\_aa\_bb\_NH; *9*, na\_base\_O\_aa\_bb\_NH; *10*, na\_O\_aa\_bb\_NH; *11*, na\_P\_aa\_bb\_NH.

Table 3. Angle-dependent energies (not scaled) for hydrogen bonds between na\_base\_N and aa\_bb\_NH.

| <i>ANGLE BIN</i><br>(10° per bin) | <i>ENERGY</i> |              |              |
|-----------------------------------|---------------|--------------|--------------|
|                                   | <i>E (X)</i>  | <i>E (Y)</i> | <i>E (Z)</i> |
| -180                              | -1.75         | -            | -            |
| -170                              | -2.00         | -            | -            |
| -160                              | -1.75         | -            | -            |
| -150                              | -0.90         | -            | -            |
| -140                              | -1.19         | -            | -            |
| -130                              | 0.20          | -            | -            |
| -120                              | -             | -            | -            |
| -110                              | -             | -            | -            |
| -100                              | -             | -            | -            |
| -90                               | -             | -            | -            |
| -80                               | -             | -            | -            |
| -70                               | -             | -            | -            |
| -60                               | -             | -            | -            |
| -50                               | -             | -            | -            |
| -40                               | -             | -            | -            |
| -30                               | -             | -            | -            |
| -20                               | -             | -            | -            |
| -10                               | -             | -            | -            |
| 0                                 | -             | -            | -            |
| 10                                | -             | -            | -            |
| 20                                | -             | -            | -            |
| 30                                | -             | -            | -            |
| 40                                | -             | -            | -            |
| 50                                | -             | -            | -            |
| 60                                | -             | -            | -            |
| 70                                | -             | -            | -            |
| 80                                | -             | -            | -            |
| 90                                | -             | 0.37         | -            |
| 100                               | -             | -1.24        | -            |
| 110                               | -             | -2.47        | 1.59         |
| 120                               | -             | -1.71        | 1.59         |
| 130                               | -0.49         | -2.40        | 0.90         |
| 140                               | -1.19         | -1.24        | -0.97        |
| 150                               | -0.49         | -            | -1.67        |
| 160                               | -0.49         | -            | -2.40        |
| 170                               | -0.90         | -            | -2.79        |

Table 4. Angle-dependent energies (not scaled) for hydrogen bonds between na\_base\_N and aa\_sc\_NH.

| <i>ANGLE BIN</i><br>(10° per bin) | <i>ENERGY</i> |              |              |
|-----------------------------------|---------------|--------------|--------------|
|                                   | <i>E (X)</i>  | <i>E (Y)</i> | <i>E (Z)</i> |
| -180                              | -2.12         | -            | -            |
| -170                              | -1.53         | -            | -            |
| -160                              | -1.05         | -            | -            |
| -150                              | -0.69         | -            | -            |
| -140                              | -0.22         | -            | -            |
| -130                              | 0.29          | -            | -            |
| -120                              | 0.47          | -            | -            |
| -110                              | -             | -            | -            |
| -100                              | -             | -            | -            |
| -90                               | -             | -            | -            |
| -80                               | -             | -            | -            |
| -70                               | -             | -            | -            |
| -60                               | -             | -            | -            |
| -50                               | -             | -            | -            |
| -40                               | -             | -            | -            |
| -30                               | -             | -            | -            |
| -20                               | -             | -            | -            |
| -10                               | -             | -            | -            |
| 0                                 | -             | -            | -            |
| 10                                | -             | -            | -            |
| 20                                | -             | -            | -            |
| 30                                | -             | -            | -            |
| 40                                | -             | -            | -            |
| 50                                | -             | -            | -            |
| 60                                | -             | -            | -            |
| 70                                | -             | -            | 3.25         |
| 80                                | -             | -            | 1.86         |
| 90                                | -             | -0.26        | 3.25         |
| 100                               | 2.08          | -1.19        | 1.30         |
| 110                               | 1.39          | -2.29        | 0.42         |
| 120                               | 0.29          | -2.28        | 0.42         |
| 130                               | 0.14          | -1.84        | -0.64        |
| 140                               | 0.47          | -1.19        | -1.11        |
| 150                               | -0.69         | -0.74        | -1.70        |
| 160                               | -1.38         | -            | -2.47        |
| 170                               | -1.92         | -            | -2.48        |

Table 5. Angle-dependent energies (not scaled) for hydrogen bonds between na\_base\_O and aa\_bb\_NH.

| <i>ANGLE BIN</i><br>(10° per bin) | <i>ENERGY</i> |              |              |
|-----------------------------------|---------------|--------------|--------------|
|                                   | <i>E (X)</i>  | <i>E (Y)</i> | <i>E (Z)</i> |
| -180                              | 0.96          | -            | -            |
| -170                              | 0.96          | -            | -            |
| -160                              | 0.27          | -            | -            |
| -150                              | -0.14         | -            | -            |
| -140                              | -0.43         | -            | -            |
| -130                              | -0.14         | -            | -            |
| -120                              | -0.99         | -            | -            |
| -110                              | 0.96          | -            | -            |
| -100                              | 0.27          | -            | -            |
| -90                               | 0.27          | -            | -            |
| -80                               | 0.27          | -            | -            |
| -70                               | -0.14         | -            | -            |
| -60                               | -0.14         | -            | -            |
| -50                               | 0.27          | -            | -            |
| -40                               | -0.65         | -            | -            |
| -30                               | -0.99         | -            | -            |
| -20                               | -0.65         | -            | -            |
| -10                               | 0.27          | -            | -            |
| 0                                 | 0.27          | -            | -            |
| 10                                | -1.53         | -            | -            |
| 20                                | -1.12         | -            | -            |
| 30                                | -0.14         | -            | -            |
| 40                                | -0.65         | -            | -            |
| 50                                | 0.27          | -            | -            |
| 60                                | -             | -            | -            |
| 70                                | -             | 1.33         | -            |
| 80                                | -             | -0.46        | -            |
| 90                                | -             | -0.46        | -            |
| 100                               | 0.27          | 0.23         | -            |
| 110                               | -             | -1.24        | 0.58         |
| 120                               | -0.14         | -1.67        | 0.80         |
| 130                               | 0.96          | -2.00        | 0.25         |
| 140                               | -             | -2.04        | -1.10        |
| 150                               | -             | -1.81        | -1.76        |
| 160                               | -             | -0.62        | -2.62        |
| 170                               | 0.96          | -            | -2.44        |

Table 6. Angle-dependent energies (not scaled) for hydrogen bonds between na\_base\_O and aa\_sc\_NH.

| ANGLE BIN<br>(10° per bin) | ENERGY  |            |              |
|----------------------------|---------|------------|--------------|
|                            | $E (X)$ | $E (\Psi)$ | $E (\Theta)$ |
| -180                       | 2.28    | -          | -            |
| -170                       | -0.02   | -          | -            |
| -160                       | 0.20    | -          | -            |
| -150                       | 0.20    | -          | -            |
| -140                       | 0.20    | -          | -            |
| -130                       | 0.20    | -          | -            |
| -120                       | 0.67    | -          | -            |
| -110                       | 0.49    | -          | -            |
| -100                       | 0.20    | -          | -            |
| -90                        | 0.08    | -          | -            |
| -80                        | 0.20    | -          | -            |
| -70                        | 0.89    | -          | -            |
| -60                        | 0.33    | -          | -            |
| -50                        | -0.20   | -          | -            |
| -40                        | 0.20    | -          | -            |
| -30                        | 0.08    | -          | -            |
| -20                        | -0.49   | -          | -            |
| -10                        | -0.55   | -          | -            |
| 0                          | -1.33   | -          | -            |
| 10                         | -1.25   | -          | -            |
| 20                         | -0.66   | -          | -            |
| 30                         | -0.12   | -          | -            |
| 40                         | -0.61   | -          | -            |
| 50                         | -0.28   | -          | -            |
| 60                         | 0.20    | -          | 2.42         |
| 70                         | 0.33    | 2.84       | 1.72         |
| 80                         | 0.49    | 2.84       | 1.72         |
| 90                         | 0.89    | 0.20       | 0.91         |
| 100                        | 0.49    | -0.45      | 0.62         |
| 110                        | 0.89    | -1.43      | -0.39        |
| 120                        | 0.33    | -1.60      | -0.80        |
| 130                        | 0.89    | -1.66      | -1.36        |
| 140                        | 2.28    | -1.49      | -1.52        |
| 150                        | 0.20    | -1.68      | -1.95        |
| 160                        | 0.08    | -1.39      | -2.11        |
| 170                        | 0.89    | -1.67      | -1.97        |

Table 7. Angle-dependent energies (not scaled) for hydrogen bonds between na\_NH and aa\_bb\_O.

| ANGLE BIN<br>(10° per bin) | ENERGY |           |             |
|----------------------------|--------|-----------|-------------|
|                            | $E(X)$ | $E(\Psi)$ | $E(\Theta)$ |
| -180                       | 1.58   | -         | -           |
| -170                       | 0.88   | -         | -           |
| -160                       | 0.88   | -         | -           |
| -150                       | 1.58   | -         | -           |
| -140                       | 1.58   | -         | -           |
| -130                       | 1.58   | -         | -           |
| -120                       | 0.19   | -         | -           |
| -110                       | -0.62  | -         | -           |
| -100                       | -0.22  | -         | -           |
| -90                        | 0.88   | -         | -           |
| -80                        | -0.62  | -         | -           |
| -70                        | 0.19   | -         | -           |
| -60                        | 0.48   | -         | -           |
| -50                        | -0.37  | -         | -           |
| -40                        | -0.50  | -         | -           |
| -30                        | 0.19   | -         | -           |
| -20                        | 0.19   | -         | -           |
| -10                        | -0.50  | -         | -           |
| 0                          | -0.22  | -         | -           |
| 10                         | 0.88   | -         | -           |
| 20                         | -0.37  | -         | -           |
| 30                         | -0.37  | -         | -           |
| 40                         | 0.48   | -         | -           |
| 50                         | 0.48   | -         | -           |
| 60                         | -0.03  | -         | -           |
| 70                         | -0.37  | -         | -           |
| 80                         | 0.48   | -         | -           |
| 90                         | -0.73  | 0.22      | 2.14        |
| 100                        | 0.19   | 0.40      | 1.73        |
| 110                        | -0.73  | -1.32     | 0.64        |
| 120                        | -0.62  | -1.86     | 0.75        |
| 130                        | -0.62  | -2.07     | -0.34       |
| 140                        | 0.48   | -1.98     | -0.93       |
| 150                        | -0.03  | -1.84     | -2.00       |
| 160                        | 0.48   | -0.39     | -2.07       |
| 170                        | 0.88   | -0.39     | -2.74       |



Table 8. Angle-dependent energies (not scaled) for hydrogen bonds between na\_NH and aa\_sc\_sp2.

| <i>ANGLE BIN</i><br>(10° per bin) | <i>ENERGY</i> |              |              |
|-----------------------------------|---------------|--------------|--------------|
|                                   | <i>E (X)</i>  | <i>E (Y)</i> | <i>E (Z)</i> |
| -180                              | -1.23         | -            | -            |
| -170                              | -0.82         | -            | -            |
| -160                              | -0.42         | -            | -            |
| -150                              | -0.88         | -            | -            |
| -140                              | -0.98         | -            | -            |
| -130                              | -0.42         | -            | -            |
| -120                              | 0.12          | -            | -            |
| -110                              | -0.24         | -            | -            |
| -100                              | 0.97          | -            | -            |
| -90                               | -0.01         | -            | -            |
| -80                               | 0.68          | -            | -            |
| -70                               | 0.68          | -            | -            |
| -60                               | 0.27          | -            | -            |
| -50                               | 1.37          | -            | -            |
| -40                               | 0.46          | -            | -            |
| -30                               | 2.07          | -            | -            |
| -20                               | 1.37          | -            | -            |
| -10                               | 0.27          | -            | -            |
| 0                                 | 1.37          | -            | -            |
| 10                                | 1.37          | -            | -            |
| 20                                | 0.46          | -            | -            |
| 30                                | 0.46          | -            | -            |
| 40                                | 0.68          | -            | -            |
| 50                                | 0.12          | -            | -            |
| 60                                | 1.37          | 0.43         | -            |
| 70                                | 2.07          | -0.03        | -            |
| 80                                | 0.68          | -0.03        | -            |
| 90                                | 0.46          | -0.19        | 3.33         |
| 100                               | 0.27          | -1.46        | 2.23         |
| 110                               | 0.97          | -1.64        | 1.94         |
| 120                               | -0.13         | -2.09        | 0.69         |
| 130                               | -0.24         | -1.58        | -0.50        |
| 140                               | -0.13         | -1.12        | -1.19        |
| 150                               | 0.12          | -0.89        | -1.64        |
| 160                               | -0.93         | -0.76        | -2.45        |
| 170                               | -0.71         | -0.72        | -2.60        |

Table 9. Angle-dependent energies (not scaled) for hydrogen bonds between na\_NH and aa\_sc\_sp3.

| <i>ANGLE BIN</i><br>(10° per bin) | <i>ENERGY</i> |              |              |
|-----------------------------------|---------------|--------------|--------------|
|                                   | <i>E (X)</i>  | <i>E (Y)</i> | <i>E (Z)</i> |
| -180                              | -0.75         | -            | -            |
| -170                              | -0.34         | -            | -            |
| -160                              | -             | -            | -            |
| -150                              | -0.34         | -            | -            |
| -140                              | 0.35          | -            | -            |
| -130                              | 0.35          | -            | -            |
| -120                              | -             | -            | -            |
| -110                              | 0.35          | -            | -            |
| -100                              | 0.35          | -            | -            |
| -90                               | -             | -            | -            |
| -80                               | -             | -            | -            |
| -70                               | -             | -            | -            |
| -60                               | 0.35          | -            | -            |
| -50                               | -0.75         | -            | -            |
| -40                               | 0.35          | -            | -            |
| -30                               | 0.35          | -            | -            |
| -20                               | 0.35          | -            | -            |
| -10                               | -0.34         | -            | -            |
| 0                                 | -             | -            | -            |
| 10                                | 0.35          | -            | -            |
| 20                                | 0.35          | -            | -            |
| 30                                | 0.35          | -            | -            |
| 40                                | -0.34         | -            | -            |
| 50                                | -             | -            | -            |
| 60                                | -             | -            | -            |
| 70                                | -0.34         | -            | 1.15         |
| 80                                | -0.34         | -0.10        | 1.15         |
| 90                                | -             | -1.36        | 0.46         |
| 100                               | 0.35          | -1.81        | -0.23        |
| 110                               | -1.26         | -1.36        | 1.15         |
| 120                               | -0.75         | -1.71        | -0.23        |
| 130                               | -1.04         | -1.36        | -1.62        |
| 140                               | 0.35          | -0.51        | -1.15        |
| 150                               | -0.34         | -1.61        | -2.11        |
| 160                               | 0.35          | -1.36        | -2.14        |
| 170                               | -1.26         | -            | -1.94        |

Table 10. Angle-dependent energies (not scaled) for hydrogen bonds between na\_O and aa\_bb\_NH.

| <i>ANGLE BIN</i><br>(10° per bin) | <i>ENERGY</i> |              |              |
|-----------------------------------|---------------|--------------|--------------|
|                                   | <i>E (X)</i>  | <i>E (Y)</i> | <i>E (Z)</i> |
| -180                              | 0.80          | -            | -            |
| -170                              | -0.59         | -            | -            |
| -160                              | -0.99         | -            | -            |
| -150                              | -0.81         | -            | -            |
| -140                              | -0.30         | -            | -            |
| -130                              | 0.11          | -            | -            |
| -120                              | 0.11          | -            | -            |
| -110                              | 0.80          | -            | -            |
| -100                              | 0.80          | -            | -            |
| -90                               | 0.11          | -            | -            |
| -80                               | -0.30         | -            | -            |
| -70                               | -0.30         | -            | -            |
| -60                               | 0.11          | -            | -            |
| -50                               | -             | -            | -            |
| -40                               | 0.11          | -            | -            |
| -30                               | 0.11          | -            | -            |
| -20                               | 0.80          | -            | -            |
| -10                               | 0.11          | -            | -            |
| 0                                 | 0.80          | -            | -            |
| 10                                | 0.11          | -            | -            |
| 20                                | -             | -            | -            |
| 30                                | -0.59         | -            | -            |
| 40                                | -0.59         | -            | -            |
| 50                                | 0.11          | -            | -            |
| 60                                | -0.3          | -            | -            |
| 70                                | 0.11          | -            | -            |
| 80                                | 0.11          | 1.20         | -            |
| 90                                | 0.80          | 0.50         | -            |
| 100                               | 0.80          | -0.19        | -            |
| 110                               | -0.59         | -1.44        | 0.44         |
| 120                               | -0.59         | -1.80        | -0.47        |
| 130                               | 0.80          | -1.75        | -0.94        |
| 140                               | -0.30         | -1.98        | -1.47        |
| 150                               | -             | -2.06        | -1.43        |
| 160                               | -0.30         | -0.75        | -2.16        |
| 170                               | 0.80          | -            | -2.55        |

Table 11. Angle-dependent energies (not scaled) for hydrogen bonds between na\_O and aa\_sc\_NH.

| <i>ANGLE BIN</i><br>(10° per bin) | <i>ENERGY</i> |              |              |
|-----------------------------------|---------------|--------------|--------------|
|                                   | <i>E (X)</i>  | <i>E (Y)</i> | <i>E (Z)</i> |
| -180                              | -0.06         | -            | -            |
| -170                              | 0.10          | -            | -            |
| -160                              | 0.28          | -            | -            |
| -150                              | 0.10          | -            | -            |
| -140                              | -0.31         | -            | -            |
| -130                              | -0.31         | -            | -            |
| -120                              | -0.19         | -            | -            |
| -110                              | 0.50          | -            | -            |
| -100                              | -0.06         | -            | -            |
| -90                               | 0.50          | -            | -            |
| -80                               | -0.06         | -            | -            |
| -70                               | 0.28          | -            | -            |
| -60                               | -0.19         | -            | -            |
| -50                               | -0.68         | -            | -            |
| -40                               | -0.19         | -            | -            |
| -30                               | 0.50          | -            | -            |
| -20                               | -0.51         | -            | -            |
| -10                               | 0.50          | -            | -            |
| 0                                 | 0.28          | -            | -            |
| 10                                | 0.79          | -            | -            |
| 20                                | 0.79          | -            | -            |
| 30                                | 0.28          | -            | -            |
| 40                                | -0.06         | -            | -            |
| 50                                | -0.31         | 2.16         | -            |
| 60                                | 0.28          | 2.16         | 2.59         |
| 70                                | -0.06         | 2.16         | 1.50         |
| 80                                | 1.89          | 0.77         | 0.80         |
| 90                                | -0.31         | -0.14        | 0.80         |
| 100                               | -0.31         | -1.5         | 0.03         |
| 110                               | 0.50          | -1.83        | -0.62        |
| 120                               | -0.06         | -1.97        | -1.28        |
| 130                               | 0.10          | -1.87        | -1.55        |
| 140                               | -0.19         | -1.71        | -1.48        |
| 150                               | -0.41         | -1.34        | -1.81        |
| 160                               | -0.31         | 1.06         | -1.97        |
| 170                               | 0.10          | -            | -1.79        |

Table 12. Angle-dependent energies (not scaled) for hydrogen bonds between na\_P and aa\_bb\_NH.

| ANGLE BIN<br>(10° per bin) | ENERGY                |                       |                       |
|----------------------------|-----------------------|-----------------------|-----------------------|
|                            | <i>E</i> ( <i>X</i> ) | <i>E</i> ( <i>Y</i> ) | <i>E</i> ( <i>θ</i> ) |
| -180                       | 0.22                  | -                     | -                     |
| -170                       | 1.54                  | -                     | -                     |
| -160                       | 0.62                  | -                     | -                     |
| -150                       | 0.62                  | -                     | -                     |
| -140                       | 1.13                  | -                     | -                     |
| -130                       | 1.83                  | -                     | -                     |
| -120                       | 0.85                  | -                     | -                     |
| -110                       | 0.36                  | -                     | -                     |
| -100                       | 0.85                  | -                     | -                     |
| -90                        | 0.98                  | -                     | -                     |
| -80                        | 0.44                  | -                     | -                     |
| -70                        | 0.73                  | -                     | -                     |
| -60                        | 0.36                  | -                     | -                     |
| -50                        | 0.15                  | -                     | -                     |
| -40                        | -0.37                 | -                     | -                     |
| -30                        | -0.44                 | -                     | -                     |
| -20                        | -0.66                 | -                     | -                     |
| -10                        | -0.71                 | -                     | -                     |
| 0                          | -0.99                 | -                     | -                     |
| 10                         | -0.44                 | -                     | -                     |
| 20                         | -0.47                 | -                     | -                     |
| 30                         | -0.41                 | -                     | -                     |
| 40                         | 0.04                  | -                     | -                     |
| 50                         | -0.29                 | -                     | -                     |
| 60                         | -0.02                 | -                     | -                     |
| 70                         | 1.54                  | 2.61                  | -                     |
| 80                         | 0.98                  | 0.66                  | -                     |
| 90                         | -0.29                 | -0.06                 | 4.25                  |
| 100                        | -0.47                 | -1.13                 | 3.56                  |
| 110                        | -0.37                 | -1.71                 | 2.30                  |
| 120                        | -0.47                 | -1.96                 | 0.59                  |
| 130                        | -0.29                 | -1.69                 | -0.08                 |
| 140                        | 0.22                  | -1.67                 | -0.93                 |
| 150                        | 0.44                  | -1.22                 | -1.89                 |
| 160                        | -0.16                 | -0.87                 | -2.33                 |
| 170                        | 0.44                  | -0.74                 | -2.69                 |

Table 13. Angle-dependent energies (not scaled) for hydrogen bonds between na\_P and aa\_sc\_NH.

| <i>ANGLE BIN</i><br>(10° per bin) | <i>ENERGY</i> |              |              |
|-----------------------------------|---------------|--------------|--------------|
|                                   | <i>E (X)</i>  | <i>E (Y)</i> | <i>E (Z)</i> |
| -180                              | 0.84          | -            | -            |
| -170                              | 0.91          | -            | -            |
| -160                              | 0.65          | -            | -            |
| -150                              | 0.99          | -            | -            |
| -140                              | 0.48          | -            | -            |
| -130                              | 0.99          | -            | -            |
| -120                              | 0.48          | -            | -            |
| -110                              | 0.30          | -            | -            |
| -100                              | 0.15          | -            | -            |
| -90                               | -0.16         | -            | -            |
| -80                               | 0.15          | -            | -            |
| -70                               | -0.10         | -            | -            |
| -60                               | -0.47         | -            | -            |
| -50                               | -0.16         | -            | -            |
| -40                               | -0.33         | -            | -            |
| -30                               | -0.16         | -            | -            |
| -20                               | -0.51         | -            | -            |
| -10                               | -0.28         | -            | -            |
| 0                                 | -0.31         | -            | -            |
| 10                                | -0.47         | -            | -            |
| 20                                | -0.02         | -            | -            |
| 30                                | -0.23         | -            | -            |
| 40                                | -0.31         | -            | -            |
| 50                                | 0.11          | 3.82         | 4.42         |
| 60                                | -0.16         | 2.72         | 4.42         |
| 70                                | 0.01          | 0.52         | 2.22         |
| 80                                | -0.10         | -0.44        | 1.86         |
| 90                                | -0.02         | -0.89        | 1.05         |
| 100                               | -0.23         | -1.27        | 0.92         |
| 110                               | -0.08         | -1.56        | 0.59         |
| 120                               | -0.10         | -1.73        | -0.18        |
| 130                               | -0.18         | -1.71        | -1.20        |
| 140                               | 0.43          | -1.27        | -1.59        |
| 150                               | -0.02         | -1.42        | -2.07        |
| 160                               | 0.30          | -0.86        | -2.18        |
| 170                               | 0.30          | -0.56        | -2.11        |
